# Supplementary material
Source: Springer Nature journal article supplement (https://www.springermedizin.de/resource/supplementary/13018_2007_63_MOESM8_ESM.pdf/9636242)

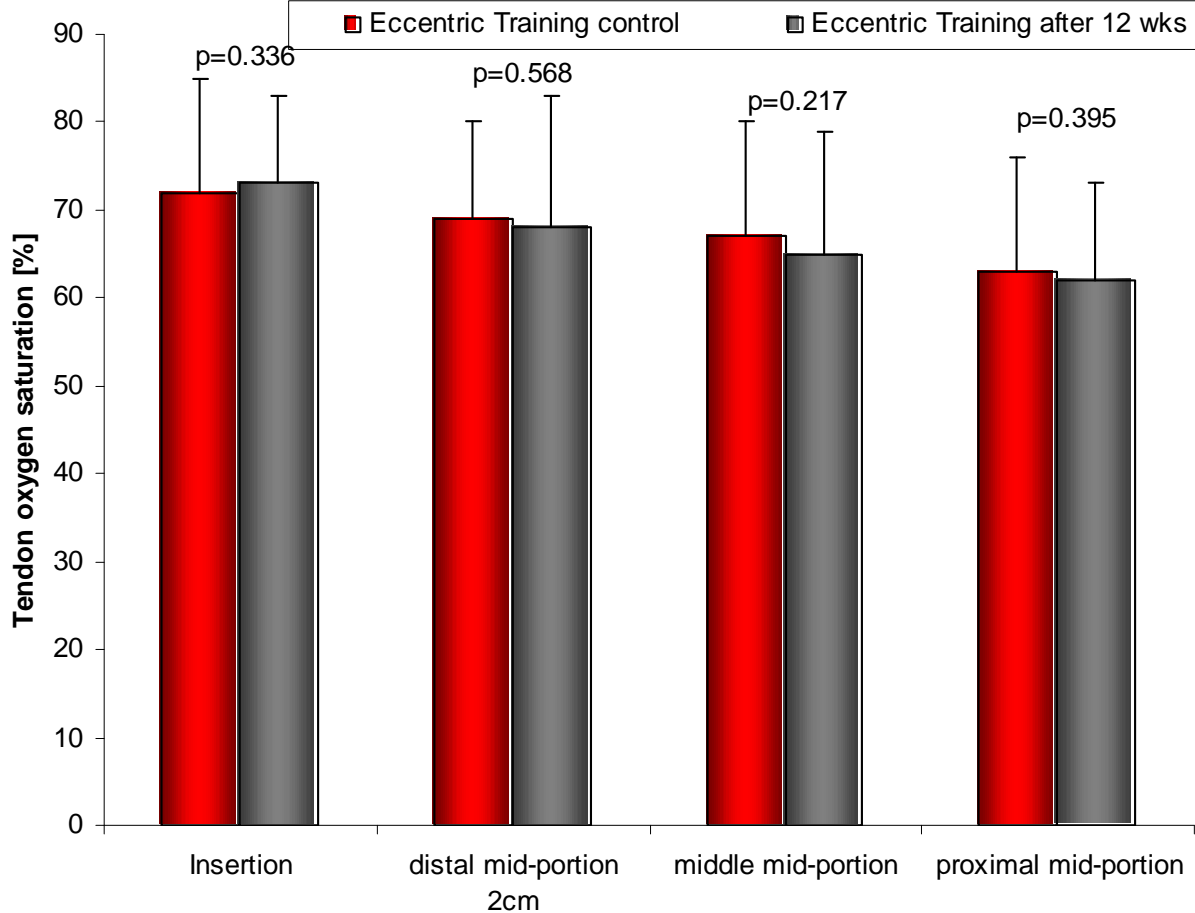

Supplement: MOESM8 [file 9636242]
